# Supplementary material for: Porosity and fluid pathway development during cadmium sequestration by calcium carbonate replacement
Source: Royal Society of Chemistry journal article supplement (doi:10.1039/d4va00316k), 2024-10-17
Supplement: d4va00316k1.pdf [file d4va00316k1.pdf]

# Supporting information for Porosity and fluid pathway development during cadmium sequestration by calcium carbonate replacement

Maude Julia<sup>a\*</sup>, Christine V. Putnis<sup>a,b</sup>, Oliver Plümper<sup>c</sup>, François Renard<sup>d,e</sup>

<sup>a</sup> Institut für Mineralogie, Universität Münster, Corrensstrasse 24, 48149 Münster, Germany

<sup>b</sup> School of Molecular and Life Sciences, Curtin University, Perth, 6845, Australia

<sup>c</sup> Department of Earth Sciences, Universiteit Utrecht, 3584 CB Utrecht, the Netherlands

<sup>d</sup> The Njord Centre, Departments of Geosciences and Physics, University of Oslo, Oslo, Norway

<sup>e</sup> ISTERre, Univ. Grenoble Alpes, Grenoble INP, Univ. Savoie Mont Blanc, CNRS, IRD, Univ. Gustave Eiffel, 38000 Grenoble, France

\* Corresponding author, *email address*: [mjulia@uni-muenster.de](mailto:mjulia@uni-muenster.de), *ORCID ID*: <https://orcid.org/0000-0003-2496-4835>

The supporting information contains eight figures.

|                                                                                                                                                                                                                                                                                                        |   |
|--------------------------------------------------------------------------------------------------------------------------------------------------------------------------------------------------------------------------------------------------------------------------------------------------------|---|
| Figure S1: X-ray diffraction spectrum of the aragonite used for the experiments. The vertical red lines indicate the main peaks of aragonite.....                                                                                                                                                      | 3 |
| Figure S2: X-ray diffraction spectrum of the Carrara marble used for the experiments. The vertical red lines indicate the main peaks of calcite.....                                                                                                                                                   | 3 |
| Figure S3: Back-scattered electron image of a Carrara marble sample reacted with similar conditions to Carrara – 05. Crystals of CdCl <sub>2</sub> are visible on the sample surface as a result of precipitation during cooling at the end of the experiments. ....                                   | 4 |
| Figure S4: Back-scattered electron image of an aragonite sample reacted with similar to Aragonite – 02. Crystals of CdCl <sub>2</sub> are visible on the sample surface as a result of precipitation during cooling at the end of the experiments. ....                                                | 4 |
| Figure S5: Evolution of the thickness of the surface reaction layer on the aragonite samples with reaction time and solution concentration (Aragonite – 01 to 05). The standard deviation of one hundred measurements on each sample is indicated by the error bars.....                               | 5 |
| Figure S6: Sample Aragonite-04 reacted for 16 days in a 2M CdCl <sub>2</sub> solution tomograph slice with measurements of the thickness of the reacted layer surrounding the sample. Note also the invasive dissolution-precipitation reaction due to reaction-induced fracturing in this sample..... | 5 |

Figure S7: Number of pores plotted against the log10 of their volume (in mm<sup>3</sup>) showing the volume repartition for the pores extracted by segmentation of the X-ray microtomography scans for the Carrara marble samples reacted in A) 2M CdCl<sub>2</sub> solution and B) 0.4M CdCl<sub>2</sub> solution. The pores were analysed using the Axis connectivity function of Avizo 3D with a 26-fold connectivity.....6

Figure S8: SEM images of : A and B) an aragonite sample reacted for 64 days in a 0.4M CdCl<sub>2</sub> solution and C) and D) a Carrara marble sample reacted 64 days in 0.4M CdCl<sub>2</sub> solution.....6

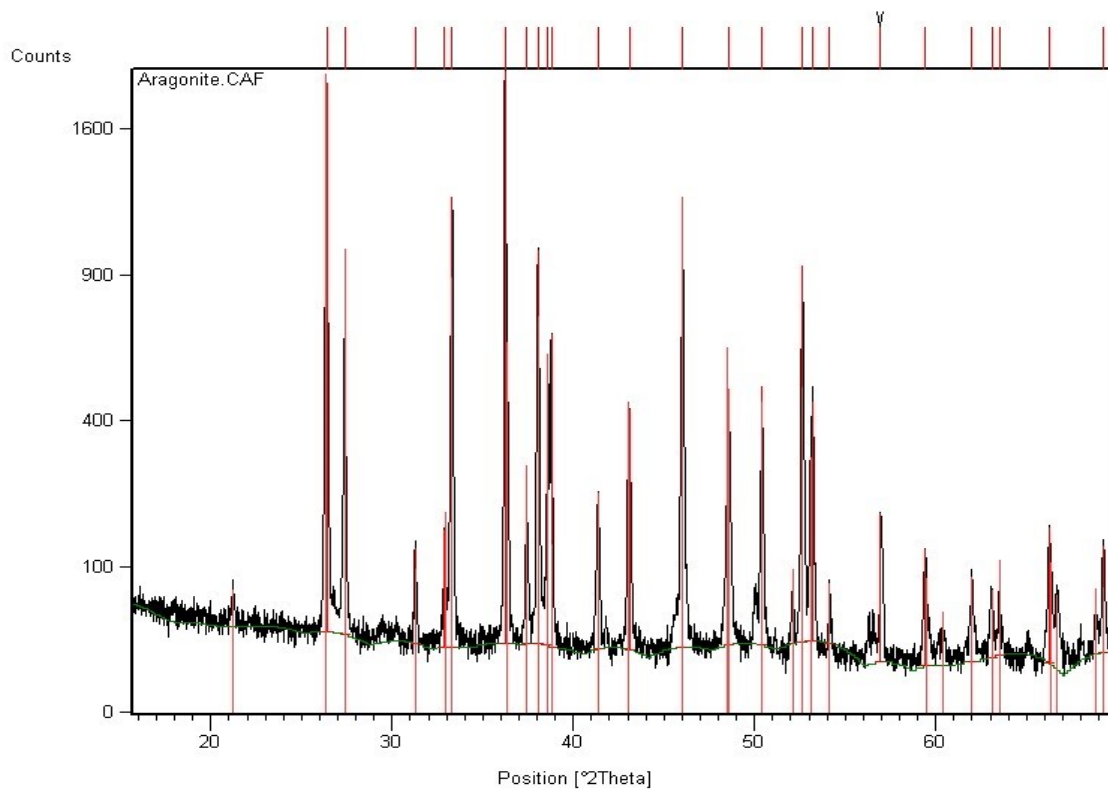

Figure S1: X-ray diffraction spectrum of the aragonite used for the experiments. The vertical red lines indicate the main peaks of aragonite.

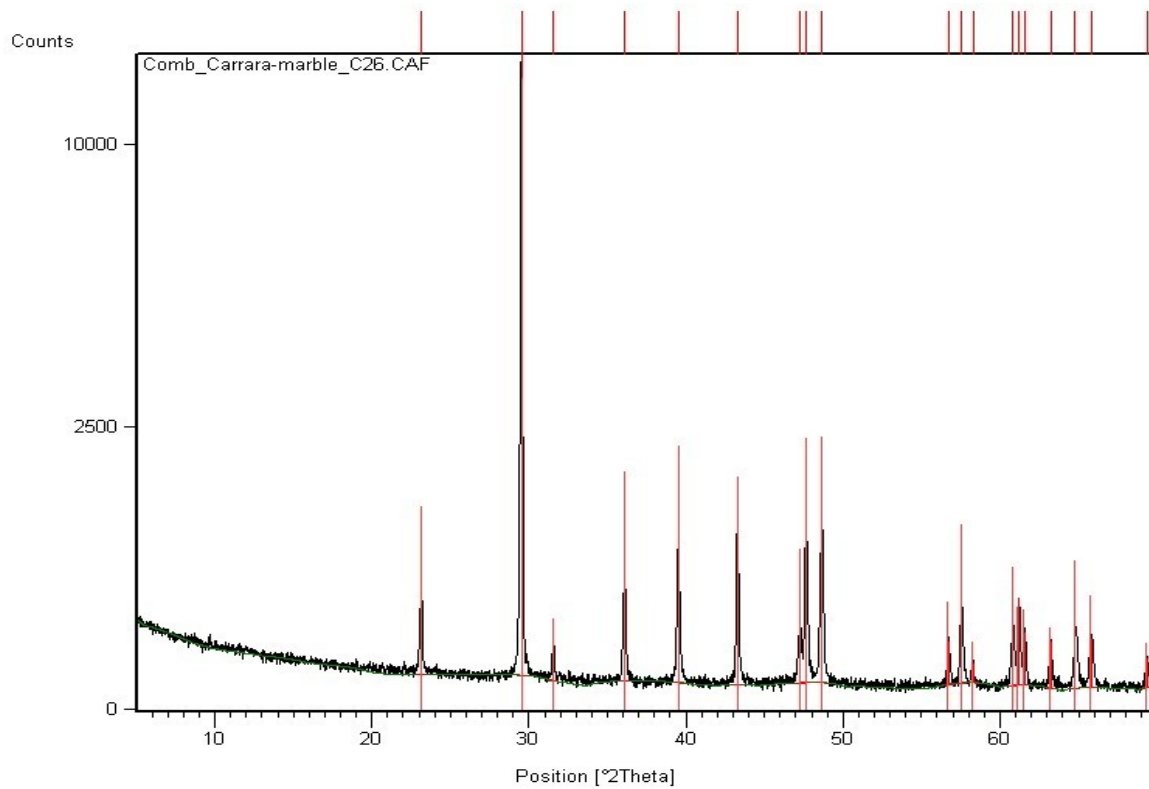

Figure S2: X-ray diffraction spectrum of the Carrara marble used for the experiments. The vertical red lines indicate the main peaks of calcite.

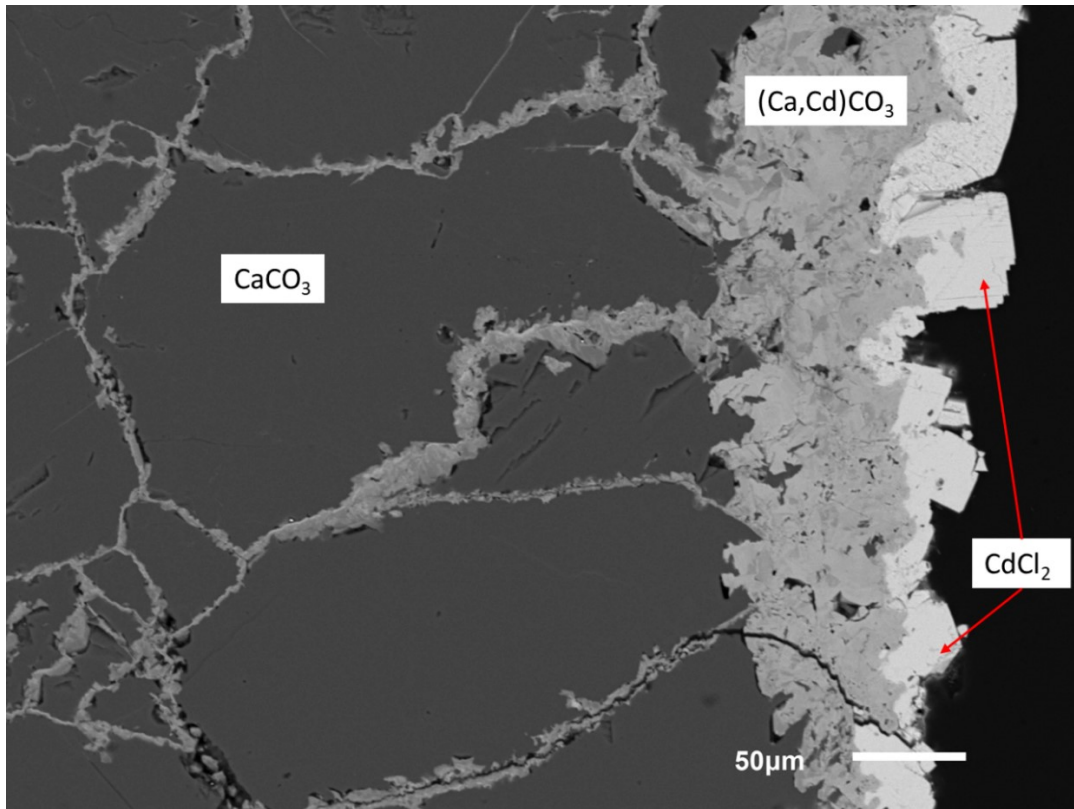

Figure S3: Back-scattered electron image of a Carrara marble sample reacted with similar conditions to Carrara – 05. Crystals of  $\text{CdCl}_2$  are visible on the sample surface as a result of precipitation during cooling at the end of the experiments.

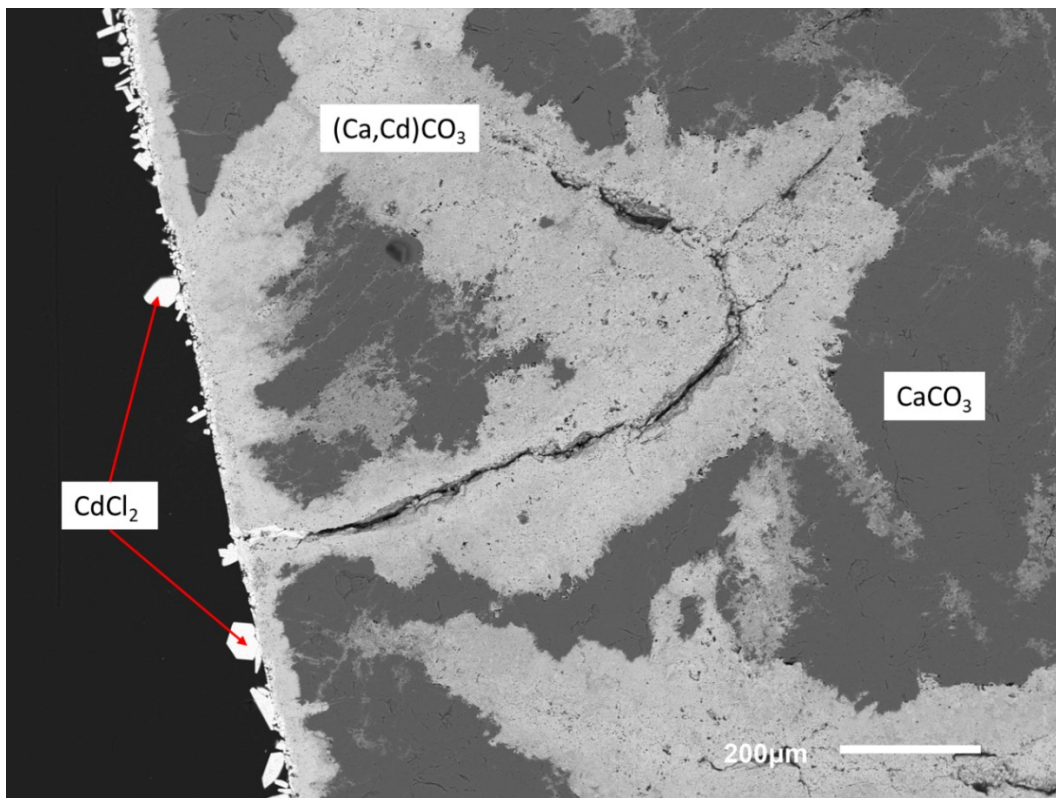

Figure S4: Back-scattered electron image of an aragonite sample reacted with similar to Aragonite – 02. Crystals of  $\text{CdCl}_2$  are visible on the sample surface as a result of precipitation during cooling at the end of the experiments.

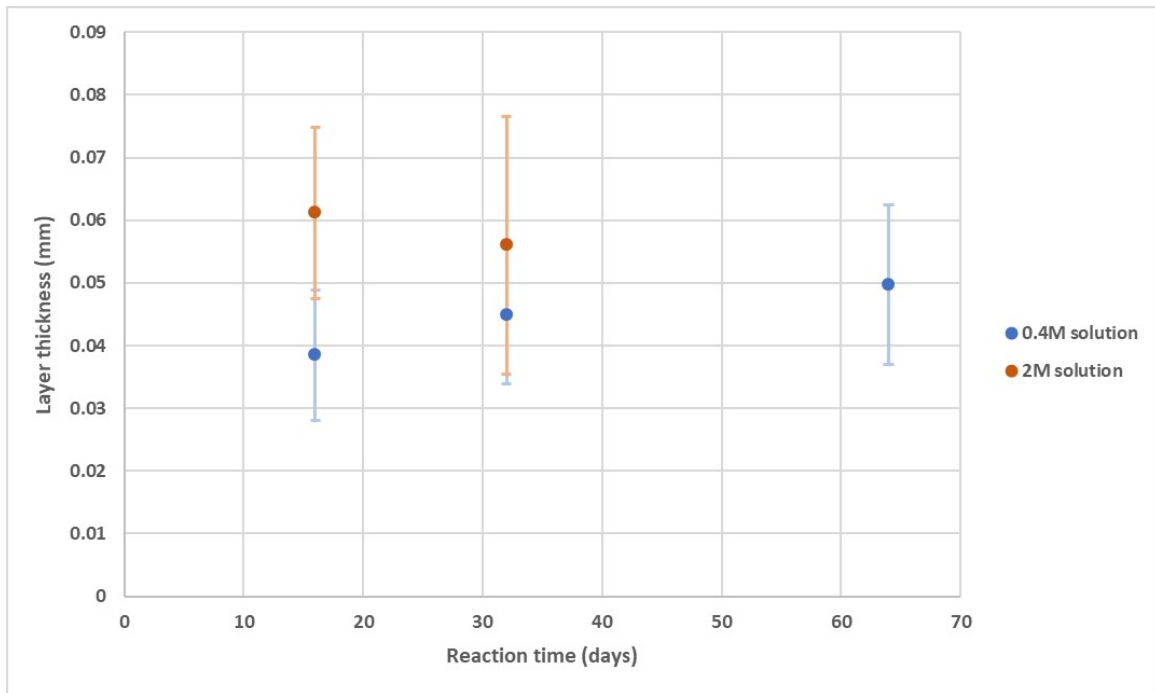

Figure S5: Evolution of the thickness of the surface reaction layer on the aragonite samples with reaction time and solution concentration (Aragonite – 01 to 05). The standard deviation of one hundred measurements on each sample is indicated by the error bars.

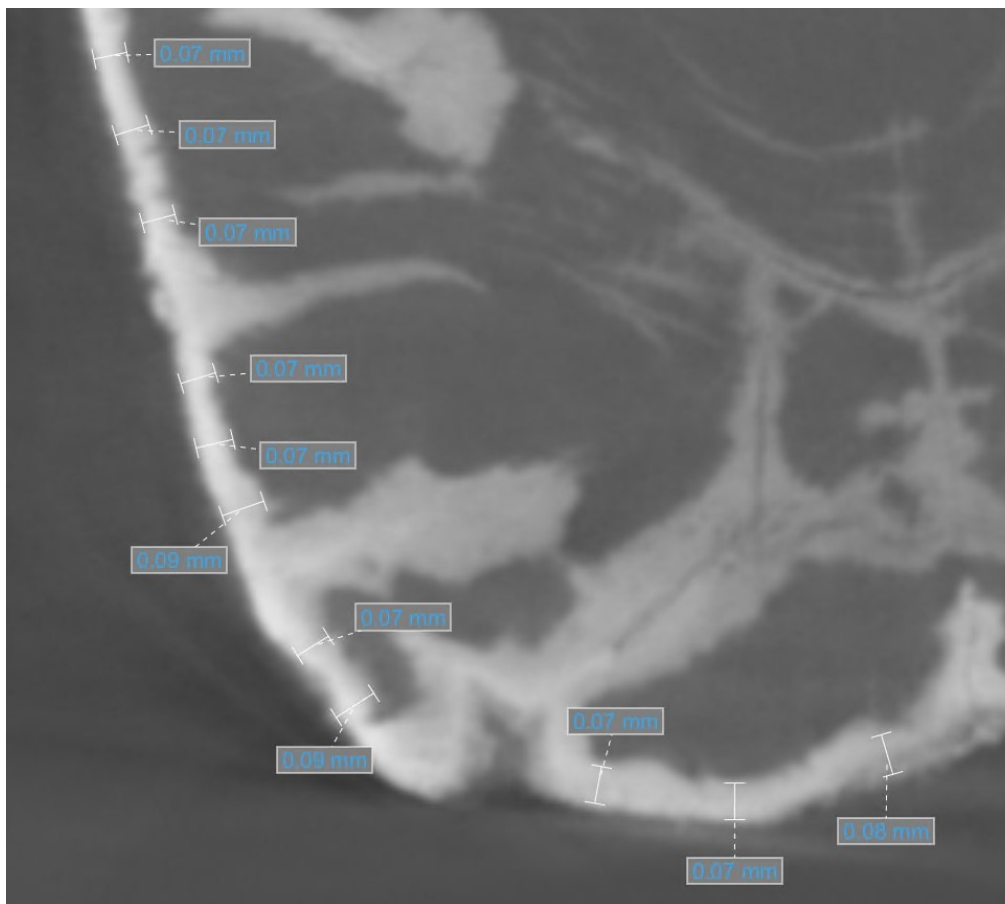

Figure S6: Sample Aragonite-04 reacted for 16 days in a 2M  $\text{CdCl}_2$  solution tomograph slice with measurements of the thickness of the reacted layer surrounding the sample. Note also the invasive dissolution-precipitation reaction due to reaction-induced fracturing in this sample.

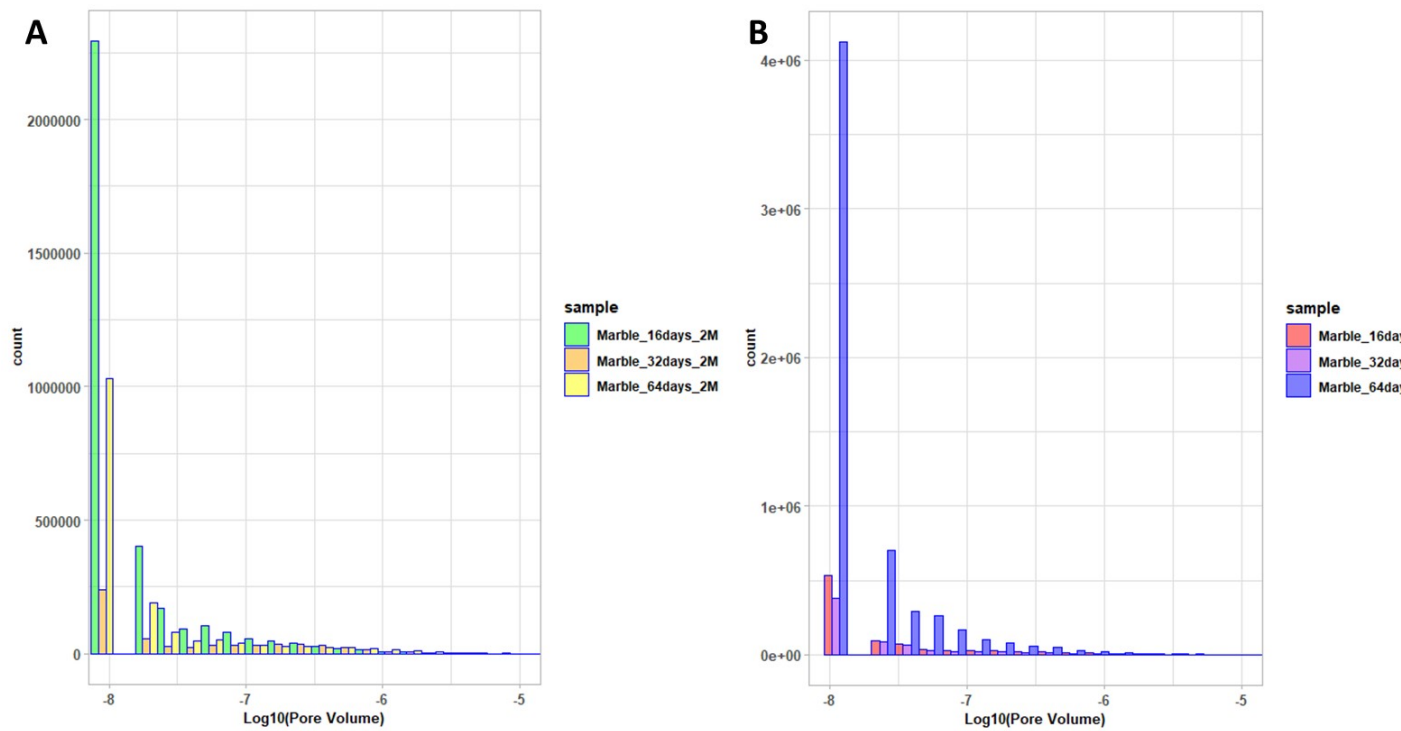

Figure S7: Number of pores plotted against the  $\log_{10}$  of their volume (in  $\text{mm}^3$ ) showing the volume repartition for the pores extracted by segmentation of the X-ray microtomography scans for the Carrara marble samples reacted in A) 2M  $\text{CdCl}_2$  solution and B) 0.4M  $\text{CdCl}_2$  solution. The pores were analysed using the Axis connectivity function of Avizo 3D with a 26-fold connectivity.



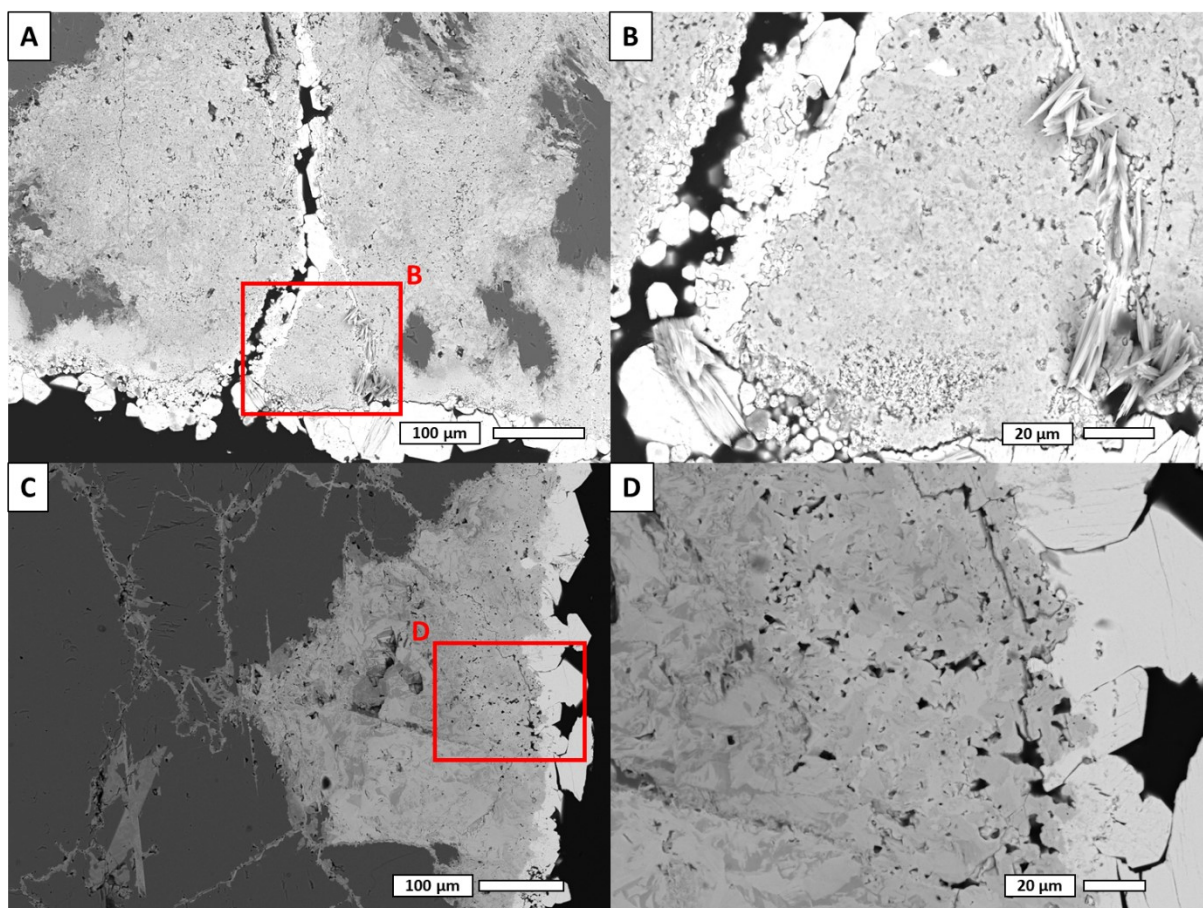

Figure S8: SEM images of : A and B) an aragonite sample reacted for 64 days in a 0.4M CdCl<sub>2</sub> solution and C) and D) a Carrara marble sample reacted 64 days in 0.4M CdCl<sub>2</sub> solution.
